# Supplementary material
Source: PubMed Central journal article supplement (PMC2825035)
Supplement: NIHMS176723-supplement-supplement_1.pdf [file NIHMS176723-supplement-supplement_1.pdf]

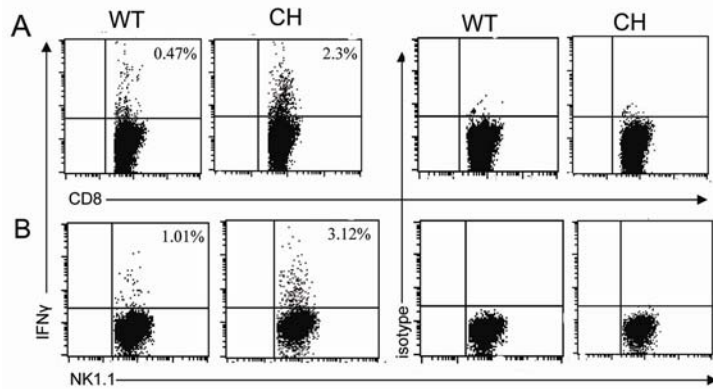

**Supplementary Figure 1. Host NK cells and T cells have increased IFN $\gamma$  production after treatment with chNKG2D T cells.** Seven days after T cell injection, spleen cells from wtNKG2D (WT) or chNKG2D T cell (CH) treated tumor bearing mice were cultured in media for 24 hours and cells were assayed for IFN $\gamma$  production by intracellular staining. Cells were gated on either (A) CD8<sup>+</sup>CD3<sup>+</sup> or (B) NK1.1<sup>+</sup>CD3<sup>-</sup> and were stained for IFN $\gamma$  or isotype control. Plots are representative of one mouse of each group (n=4). Data are representative of at least 5 separate experiments.
